# Supplementary material for: A systematic review of instruments for measuring outcomes in economic evaluation within aged care
Source: PubMed Central journal article supplement (PMC4640110; doi:10.1186/s12955-015-0372-8), 2015-11-09
Supplement: 12955_2015_372_MOESM1_ESM.pdf [file 12955_2015_372_MOESM1_ESM.pdf]

## Appendix 1: Medline search strategy

Database(s): Ovid MEDLINE(R) In-Process & Other Non-Indexed Citations and Ovid MEDLINE(R) 1946 to Present

| # ▲ | Searches                                                                                                                                                                                                | Results |
|-----|---------------------------------------------------------------------------------------------------------------------------------------------------------------------------------------------------------|---------|
| 1   | "Quality of Life"/                                                                                                                                                                                      | 129051  |
| 2   | (QOL or OQOL or HRQOL or HRQL or "quality of life").tw.                                                                                                                                                 | 171394  |
| 3   | or/1-2                                                                                                                                                                                                  | 216698  |
| 4   | Questionnaires/ or Self report/                                                                                                                                                                         | 334445  |
| 5   | Health status indicators/                                                                                                                                                                               | 20847   |
| 6   | (questionnaire? or instrument? or measures or self report? or indices or index or inventory or inventories or tool? or score? or indicator? or scale or scales or rating* or assessment or survey*).tw. | 3210785 |
| 7   | ICECAP-O.tw.                                                                                                                                                                                            | 21      |
| 8   | (SF12 or SF36 or SF6D or ((SF or short form) adj2 ("12" or "36" or 6D))).tw.                                                                                                                            | 22849   |
| 9   | (EQ5D or EuroQoL or EQ-5D).tw.                                                                                                                                                                          | 5025    |
| 10  | (ASCOT or WHOQoL OLD or WHO-QoL OLD or "Ferrans and Powers QLI").tw.                                                                                                                                    | 367     |
| 11  | or/4-10                                                                                                                                                                                                 | 3290096 |
| 12  | "reproducibility of results"/                                                                                                                                                                           | 298553  |
| 13  | (reliab* or valid* or reproducib*).tw.                                                                                                                                                                  | 817917  |
| 14  | Psychometrics/                                                                                                                                                                                          | 57939   |
| 15  | Psychometric*.tw.                                                                                                                                                                                       | 29406   |
| 16  | or/12-15                                                                                                                                                                                                | 1014358 |
| 17  | aged/ or "aged, 80 and over"/ or frail elderly/                                                                                                                                                         | 2480632 |
| 18  | (elder* or geriatric* or old age* or ((old* or aged) adj (person or people* or adult* or resident* or population* or men* or women* or male* or female*))).tw.                                          | 418495  |
| 19  | (aged adj ("65" or "70" or "75" or "80" or "85")).tw.                                                                                                                                                   | 26162   |
| 20  | or/17-19                                                                                                                                                                                                | 2664538 |
| 21  | (Nursing home* or Long term care or Longterm care or Residential aged                                                                                                                                   | 51856   |

|           |                                                                                                                                                                                                                                                                                                                                                                                                                                                                             |             |
|-----------|-----------------------------------------------------------------------------------------------------------------------------------------------------------------------------------------------------------------------------------------------------------------------------------------------------------------------------------------------------------------------------------------------------------------------------------------------------------------------------|-------------|
|           | care or LTCF or Aged care facilit* or care home* or care facilit* or residential care or "institutionalised elders" or "Institutionalised elderly" or institutionalized elder* or skilled nursing facilit*).tw.                                                                                                                                                                                                                                                             |             |
| 22        | ((extended care adj2 facilit*) or (geriatric adj2 (home* or facilit* or institution*)) or (long-term care adj2 (facilit* or institution* or setting* or resident* or provider*)) or (LTC adj2 (facilit* or institution* or setting* or resident* or provider*)) or (longterm care adj2 (facilit* or institution* or setting* or resident* or provider*)) or (residential adj2 (home* or care or facilit*)) or (long-stay adj2 (facilit* or institution* or resident*))).tw. | 12039       |
| 23        | Homes for the Aged/ or Health Services for the Aged/ or Nursing Homes/ or intermediate care facilities/ or skilled nursing facilities/ or Long-Term Care/                                                                                                                                                                                                                                                                                                                   | 69051       |
| 24        | home nursing/ or respite care/ or Home Care Services/ or Social Welfare/ or Community Health Services/ or "Activities of Daily Living"/ or Independent Living/ or Self Care/                                                                                                                                                                                                                                                                                                | 144611      |
| 25        | ((community or home* or respite or social or aged or self) adj5 (care* or welfare* or support*)).tw.                                                                                                                                                                                                                                                                                                                                                                        | 127945      |
| 26        | ((home or community or urban or rural or town or village) adj5 (dwelling or based)) or (living adj5 (home or community or independent*)) or ((retire* or senior*) adj5 (home* or communit* or facilit* or institution* or setting* or context)).tw.                                                                                                                                                                                                                         | 82891       |
| 27        | or/21-26                                                                                                                                                                                                                                                                                                                                                                                                                                                                    | 370114      |
| 28        | 3 and 11 and 16 and 20 and 27                                                                                                                                                                                                                                                                                                                                                                                                                                               | 2382        |
| <b>29</b> | <b>limit 28 to (english language and humans and yr="2000 - 2015" and "all aged (65 and over)")</b>                                                                                                                                                                                                                                                                                                                                                                          | <b>1816</b> |
